# Supplementary material
Source: publisher figshare collection journal article supplement (https://sage.figshare.com/ndownloader/files/23757716)
Supplement: Supplementary file 1 [file 23757716]

**Sex differences in Asian stroke registries for thrombolized acute ischemic stroke patients: an individual patient data pooling study**

**Wang X et al**

**Supplemental File**

**Supplemental Table 1. Patient characteristics by sex in the included stroke registries**

**Supplemental Table 2. Included stroke registries**

**Supplementary Table 3. Characteristics of eligible studies but not included in the review**

**Supplemental Table 4. Subgroup analysis of associations of sex and ordinal modified Rankin Scale scores at 90 days**

Men as reference group

Adjusted for age, baseline National Institutes of Health Stroke Scale (NIHSS) scores, baseline systolic blood pressure (SBP), premorbid mRS, etiological Trial of Org 10172 in Acute Stroke Treatment (TOAST) classification, and prior hypertension and atrial fibrillation [AF]

**Supplemental Figure 1. Flow chart of patient inclusion**

**Supplemental Figure 2. Associations of sex and all the possible dichotomizations of modified Rankin Scale scores at 90 days**

Men as reference group

Adjusted for age, baseline National Institutes of Health Stroke Scale (NIHSS) scores, baseline systolic blood pressure (SBP), premorbid mRS, etiological Trial of Org 10172 in Acute Stroke Treatment (TOAST) classification, and prior hypertension and atrial fibrillation [AF]

**Supplemental Table 1. Patient characteristics by sex in the included stroke registries**

|                                  | Japan           |                   | Mainland China       |                   | Taiwan               |                   | Philippines    |                  | Korea           |                   | Singapore       |                   |
|----------------------------------|-----------------|-------------------|----------------------|-------------------|----------------------|-------------------|----------------|------------------|-----------------|-------------------|-----------------|-------------------|
|                                  | Male<br>(n=377) | Female<br>(n=223) | Male<br>(n=841)      | Female<br>(n=458) | Male<br>(n=321)      | Female<br>(n=191) | Male<br>(n=97) | Female<br>(n=60) | Male<br>(n=905) | Female<br>(n=621) | Male<br>(n=220) | Female<br>(n=139) |
| Recruitment period               | 2005-2008       |                   | 2007-2012, 2017-2018 |                   | 2006-2010, 2017-2018 |                   | 2014-2016      |                  | 2009-2013       |                   | 2013-2018       |                   |
| Age, years                       | 69 (11.6)       | 76 (11.1)         | 62 (10.8)            | 66 (11.2)         | 65 (13.3)            | 69 (12.1)         | 59 (12.9)      | 63 (15.4)        | 66 (11.9)       | 72 (1.25)         | 60 (12.2)       | 67 (14.1)         |
| Systolic BP, mmHg                | 150 (20.9)      | 151 (18.9)        | 148 (19.5)           | 147 (20.1)        | 149 (23.0)           | 153 (28.0)        | 151 (25.4)     | 157 (27.3)       | 147 (26.8)      | 149 (28.7)        | 157 (26.0)      | 162 (24.1)        |
| NIHSS                            | 12 (7-18)       | 13 (8-20)         | 8 (4-13)             | 9 (5-15)          | 11 (7-18)            | 12 (7-17)         | 12 (6-16)      | 13 (7-18)        | 10 (6-16)       | 12 (7-17)         | 15 (10-21)      | 17 (12-21)        |
| Prior hypertension               | 62.7            | 59.3              | 58.9                 | 64.9              | 72.3                 | 78.5              | 81.4           | 80.0             | 62.7            | 68.8              | 74.6            | 82.7              |
| Prior atrial fibrillation        | 39.0            | 51.9              | 11.3                 | 21.8              | 33.3                 | 45.0              | 15.5           | 25.0             | 34.8            | 49.8              | 32.3            | 36.7              |
| Pre-morbid modified Rankin scale |                 |                   |                      |                   |                      |                   |                |                  |                 |                   |                 |                   |
| 0-1                              | 92.6            | 82.1              | 79.5                 | 83.4              | 91.9                 | 88.0              | -              | -                | 92.0            | 87.1              | -               | -                 |
| 2-5                              | 7.4             | 17.9              | 20.5                 | 16.6              | 8.1                  | 12.0              | -              | -                | 8.0             | 12.9              | -               | -                 |
| TOAST classification             |                 |                   |                      |                   |                      |                   |                |                  |                 |                   |                 |                   |
| Large-artery atherosclerosis     | 15.1            | 15.3              | 55.7                 | 46.4              | 19.0                 | 17.7              | -              | -                | 30.8            | 22.2              | 30.0            | 27.3              |
| Small-vessel occlusion           | 47.8            | 4.9               | 17.5                 | 15.2              | 17.7                 | 13.7              | -              | -                | 7.0             | 4.8               | 5.9             | 5.8               |
| Cardioembolism                   | 65.5            | 59.6              | 11.8                 | 22.0              | 25.3                 | 45.1              | -              | -                | 36.6            | 48.8              | 40.0            | 46.0              |
| Others                           | 14.6            | 20.2              | 15.0                 | 16.5              | 38.0                 | 23.5              | -              | -                | 25.6            | 24.2              | 24.1            | 20.9              |

Data are n (%), mean  $\pm$  SD, or median (IQR). P values from univariate analyzes based on Chi-square or Wilcoxon signed-rank test

BP denotes blood pressure, NIHSS National Institutes of Health Stroke Scale, mRS modified Rankin scale, TOAST Aetiological Trial of Org 10172 in Acute Stroke Treatment

**Supplemental Table 2. Included stroke registries**

| <b>Study</b>                                                                     | <b>Country/Region</b>       | <b>Definition of symptomatic intracerebral hemorrhage (sICH)</b>                                                                                                                                                                           |
|----------------------------------------------------------------------------------|-----------------------------|--------------------------------------------------------------------------------------------------------------------------------------------------------------------------------------------------------------------------------------------|
| SAMURAI (Stroke 2012;43:253-255)                                                 | Japan(national)             | SICH associated with neurological deterioration corresponding to an increase of $\geq 4$ points from baseline National Institute of Health Stroke Scale (NIHSS) score                                                                      |
| TIMS3 (Stroke 2014;45:2354-2358)                                                 | Mainland<br>China(national) | Per original NINDS study, a hemorrhage that was not seen on a previous CT scan and there had subsequently been either a suspicion of hemorrhage or any decline in neurological status                                                      |
| Changhua Christian Hospital stroke Registry (J Thromb Haemost 2012;10(7):1270-5) | Taiwan(regional)            | Per original NINDS study, a hemorrhage that was not seen on a previous CT scan and there had subsequently been either a suspicion of hemorrhage or any decline in neurological status                                                      |
| Philippines stroke Registry (Neurology Asia 2018; 23(2):115–120)                 | Philippines(national)       | SICH associated with increased in NIHSS by 4 points at any time after thrombolysis and confirmed by non-contrast CT scan                                                                                                                   |
| Korea stroke Registry (Stroke. 2015;46:2541-2548)                                | Korea(national)             | A cerebral hemorrhage documented by neuroimaging study and accompanied by an increase of $\geq 4$ points on the NIHSS score compared with baseline or from the lowest NIHSS score in the individual subject before the development of sICH |
| Stroke Registry in Chang Gung Healthcare System                                  | Taiwan(regional)            | SICH associated with neurological deterioration corresponding to an increase of $\geq 2$ points from baseline NIHSS score                                                                                                                  |
| Stroke Registry from Singapore                                                   | Singapore (national)        | Appearance of blood on CT brain scan with a significant neurologic deterioration, defined as documented objective evidence of neurological decline with an increase of $\geq 4$ points from most recent NIHSS score                        |
| Shengyang Stroke Registry                                                        | Mainland<br>China(regional) | Per ECASS II, any ICH with neurological deterioration ( $>4$ points on the NIHSS) from baseline or death within 24 to 36 hours                                                                                                             |

SAMURAI denotes for the Stroke Acute Management with Urgent Risk-Factor Assessment and Improvement rt-PA registry; TIMS3: the Thrombolysis Implementation and Monitor of Acute Ischemic Stroke in China; NINDS: the National Institute of Neurological Disorders and Stroke study; ECASS: European Cooperative Acute Stroke Study

**Supplementary Table 3. Characteristics of eligible studies but not included in the review**

| Publication                         | Origin  | Cases | TPA dose, mg/kg             | Results                                                                                                                                  |
|-------------------------------------|---------|-------|-----------------------------|------------------------------------------------------------------------------------------------------------------------------------------|
| Yamaguchi et al 2006 <sup>8</sup>   | Japan   | 103   | 0.6                         | In patients receiving 0.6 mg/kg alteplase, the outcome and the incidence of sICH were comparable to published data for 0.9 mg/kg         |
| Chao et al 2010 <sup>28</sup>       | Taiwan  | 241   | 0.72±0.07 vs. 0.90±0.02     | Standard dose of 0.9 mg/kg alteplase may not be optimal for treating aged Chinese patients                                               |
| Nakagawara et al 2010 <sup>10</sup> | Japan   | 7492  | 0.6                         | 0.6 mg/kg intravenous alteplase within 3 hours of stroke onset could be safe and effective in routine clinical practice for the Japanese |
| Nguyen et al 2010 <sup>29</sup>     | Vietnam | 121   | 0.6-0.86 vs. 0.9            | Intravenous thrombolysis, particularly in a lower dose, is safe and feasible in the treatment of AIS in selected Vietnamese population   |
| Zhou et al 2010 <sup>30</sup>       | China   | 105   | 0.6-0.7 vs. 0.8 vs. 0.9     | There was a higher proportion of patients with good functional outcomes in the 0.9mg/kg group, but not significant                       |
| Chen et al 2012 <sup>31*</sup>      | Taiwan  | 261   | <0.85 vs. ≥0.85             | Standard-dose thrombolysis for AIS in an Asian population carries no increased risk of sICH when compared with the low dose              |
| Chao et al 2014 <sup>32</sup>       | Taiwan  | 1004  | 0.6 vs. 0.7 vs. 0.8 vs. 0.9 | In elderly patients (71-80 years), a lower dose of 0.6 mg/kg is associated with a better outcome                                         |

AIS acute ischemic stroke; alteplase: recombinant tissue plasminogen activator; sICH: symptomatic intracranial hemorrhage.

\*The study was conducted in National Cheng Kung University Hospital and Changhua Christian Hospital, but only Changhua Christian Hospital provided data

**Supplemental Table 4. Subgroup analysis of associations of sex and ordinal modified Rankin Scale scores at 90 days**

|                                                                                                              | P for interaction |
|--------------------------------------------------------------------------------------------------------------|-------------------|
| Age                                                                                                          | 0.022             |
| NIHSS                                                                                                        | 0.294             |
| Prior hypertension (Y vs. N)                                                                                 | 0.062             |
| Prior atrial fibrillation (Y vs. N)                                                                          | 0.466             |
| Pre-morbid mRS (0-1 vs. 2-5)                                                                                 | 0.251             |
| TOAST classification (large-artery atherosclerosis vs. small-vessel occlusion vs. cardioembolism vs. others) | 0.868             |

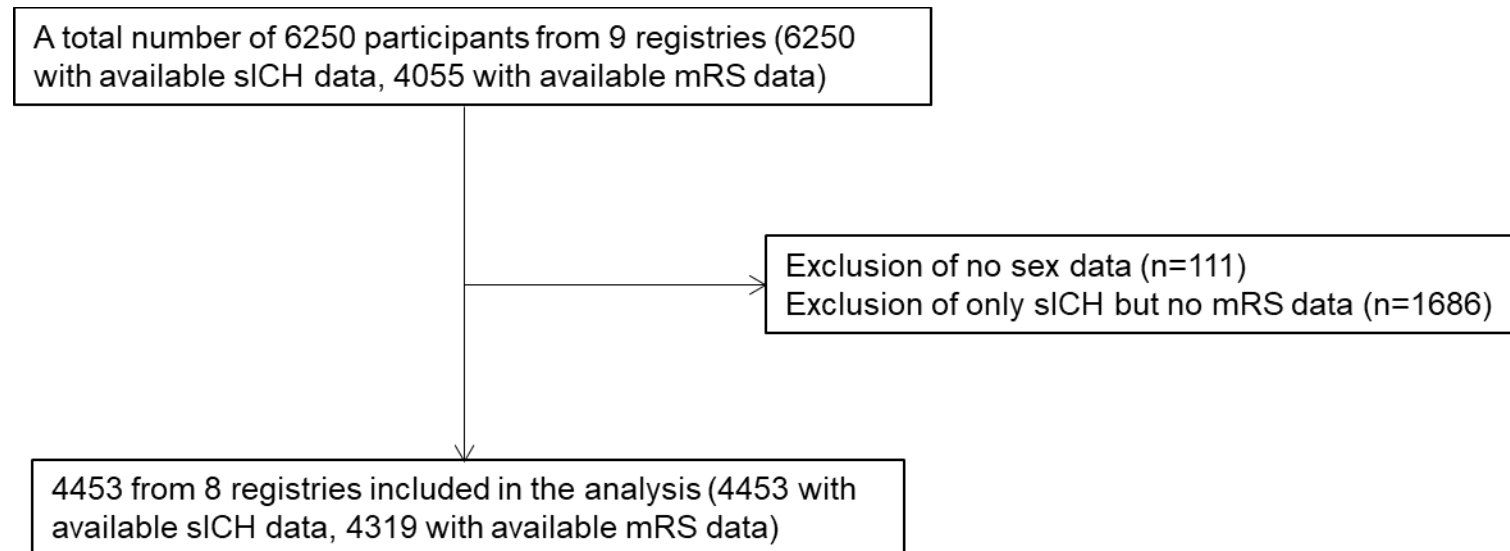

**Supplemental Figure 1. Flow chart of patient inclusion**

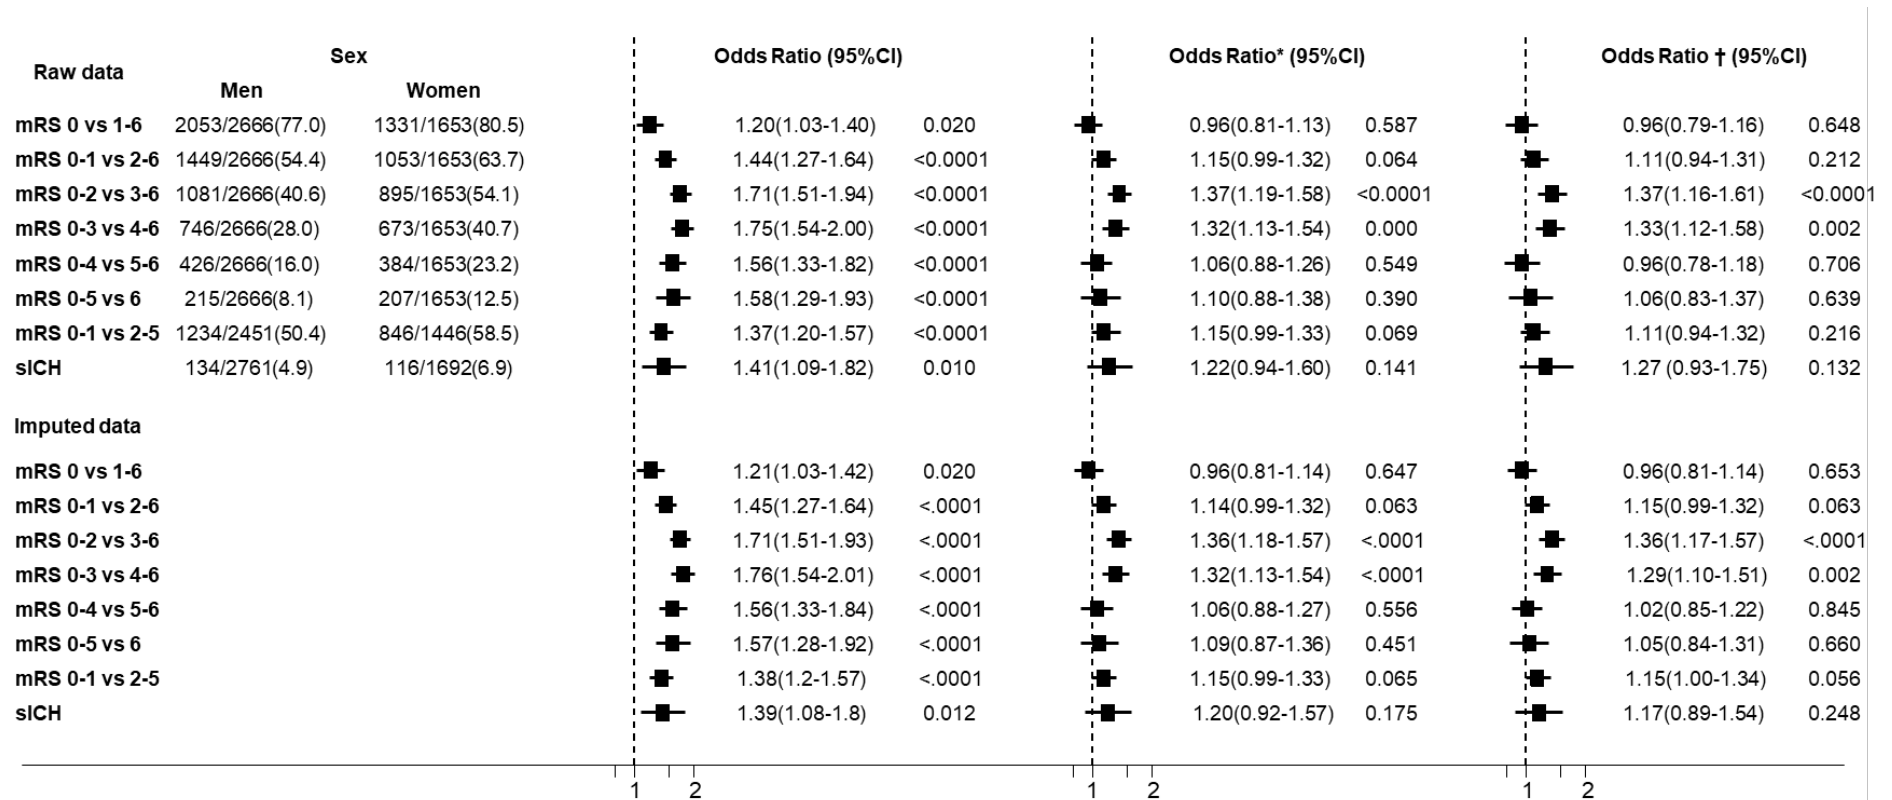

**Supplemental Figure 2. Associations of sex and all the possible dichotomizations of modified Rankin Scale scores at 90 days**
